# Supplementary material
Source: publisher figshare collection journal article supplement (https://frontiersin.figshare.com/ndownloader/files/15202937)
Supplement: Supplementary file [file 15202937]

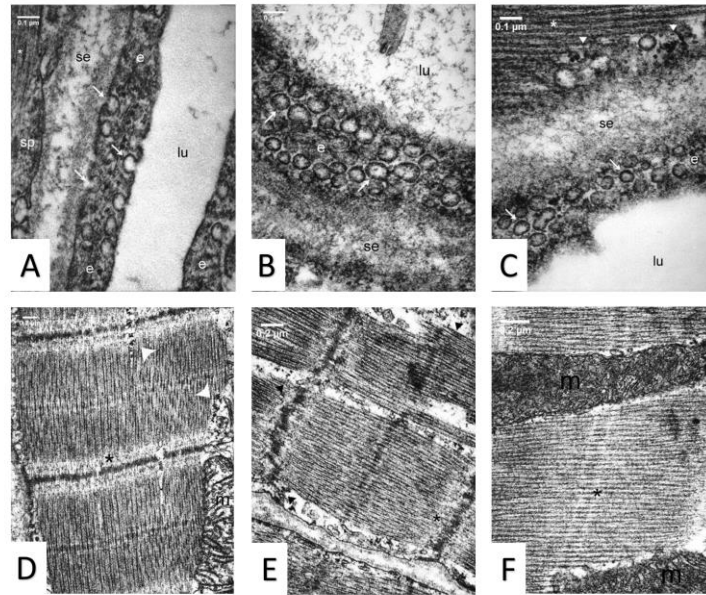

**S1 Fig. Ultrastructural analysis of the cardiomyocytes in Control (A, D), FGY120 (B, E) and FGY400 (C, F) group.** Endothelium (e), Lumen of endothelium (lu), Subendothelium (se), Vesicles (arrows), Sarcoplasm (sp), Muscle fibers (\*), Mitochondria (m), Glycogen (arrow heads), (n=5 from each group, 3-5 block from each animal).

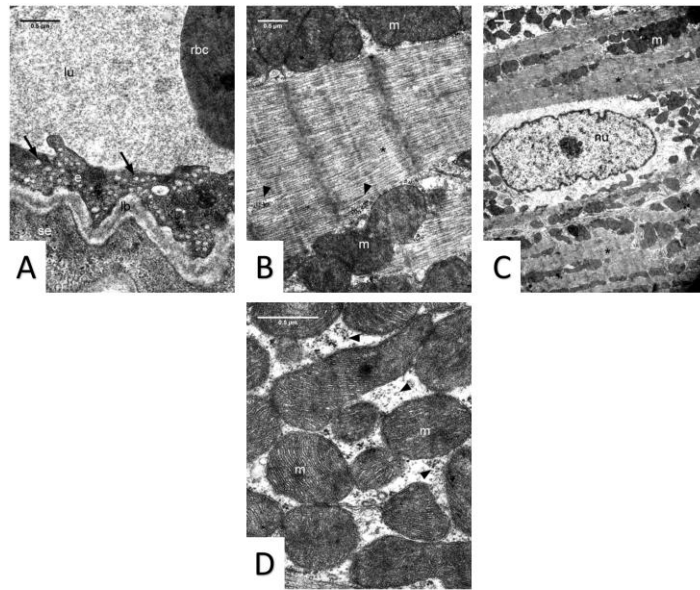

**S2 Fig. Ultrastructural analysis of the cardiomyocytes in WKY group.** Endothelium (e), Lumen of endothelium (lu), Subendothelium (se), Vesicles (arrows), Sarcoplasm (sp), Muscle fibers (\*), Mitochondria (m), Nuclei (nu), Glycogen (arrow heads), (n=5 from each group, 3-5 block from each animal).

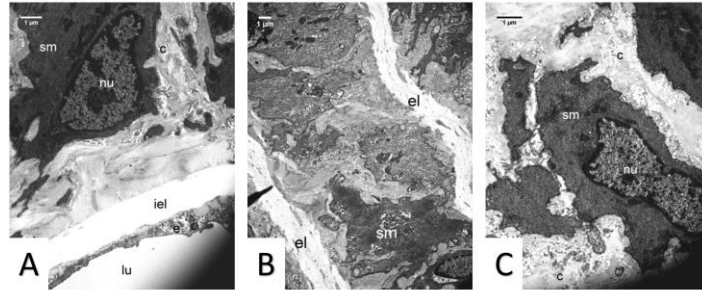

**S3 Fig. Ultrastructural analysis of the aortic wall in WKY group.** Lumen (lu), Endothelium (e), Subendothelium (se), Internal elastic lamina (iel), Smooth muscle cells (sm), Collagen fibers (c), Interruption of internal elastic lamella by the smooth muscle cells (arrows), (n=5 from each group, 3-5 block from each animal).
